# Supplementary material
Source: Springer Nature journal article supplement (https://www.springermedizin.de/resource/supplementary/12957_2011_803_MOESM4_ESM.pdf/9565912)
Supplement: MOESM4 [file 9565912]

# Recurrence free Survival distribution function

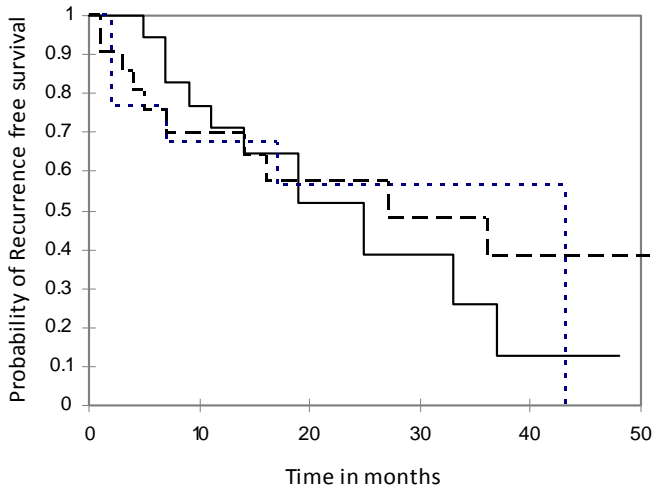

— Osteosarcoma

····· Chondrosarcoma

- - - Ewing's Sarcoma
